# Supplementary material
Source: PubMed Central journal article supplement (PMC3081903)
Supplement: NIHMS253658-supplement-01.pdf [file NIHMS253658-supplement-01.pdf]

Supplementary Table S1; Streja et al, *AJKD*, "Role of Nutritional Status and Inflammation in Higher Survival of African American and Hispanic Hemodialysis Patients"

**Table S1:** Demographic, clinical, and laboratory characteristics of the 3 mutually exclusive racial/ethnic cohorts and excluded cohort (other)

| Variable                      | All Patients          | White        | African Americans | Hispanic     | Other        | p-value ANOVA | p-value Trend |
|-------------------------------|-----------------------|--------------|-------------------|--------------|--------------|---------------|---------------|
| N (%)                         | <b>139,328 (100%)</b> | 60,657 (49%) | 43,974 (35%)      | 19,398 (15%) | 15,299 (11%) | <0.001        | <0.001        |
| Mortality (n (%))             | <b>41,664 (30)</b>    | 19,135 (32)  | 12,598 (29)       | 5,496 (28)   | 4,435 (29)   | <0.001        | <0.001        |
| Age (years)                   | <b>62±15</b>          | 65±15        | 58±15             | 59±15        | 61±15        | <0.001        | <0.001        |
| Gender (% women)              | <b>45</b>             | 42           | 49                | 45           | 46           | <0.001        | <0.001        |
| Diabetes mellitus (%)         | <b>44</b>             | 42           | 43                | 56           | 42           | <0.001        | <0.001        |
| Vintage (time on dialysis,%): |                       |              |                   |              |              |               |               |
| <6 months                     | <b>18</b>             | 21           | 14                | 15           | 16           | <0.001        | <0.001        |
| 6-24 months                   | <b>30</b>             | 34           | 26                | 29           | 27           | <0.001        | <0.001        |
| 2-5 years                     | <b>32</b>             | 31           | 32                | 34           | 33           | <0.001        | 0.6           |
| >5 years                      | <b>21</b>             | 14           | 28                | 22           | 24           | <0.001        | <0.001        |
| Primary insurance (%)         |                       |              |                   |              |              |               |               |
| Medicare                      | <b>62</b>             | 65           | 64                | 56           | 55           | <0.001        | 0.4           |
| Medicaid                      | <b>5</b>              | 2            | 6                 | 13           | 7            | <0.001        | <0.001        |
| Private Insurance             | <b>9</b>              | 9            | 8                 | 10           | 12           | <0.001        | 0.2           |
| Other                         | <b>15</b>             | 17           | 14                | 13           | 14           | <0.001        | <0.001        |
| Marital Status (%)            |                       |              |                   |              |              |               |               |
| Married                       | <b>40</b>             | 46           | 30                | 43           | 42           | <0.001        | <0.001        |
| Divorced                      | <b>7</b>              | 7            | 8                 | 6            | 5            | <0.001        | 0.4           |
| Single                        | <b>23</b>             | 16           | 34                | 22           | 19           | <0.001        | <0.001        |
| Widowed                       | <b>13</b>             | 14           | 12                | 10           | 12           | <0.001        | 0.022         |
| BMI (kg/m <sup>2</sup> )      | <b>26.8±7.0</b>       | 26.8±6.8     | 27.4±7.6          | 26.6±6.3     | 25.4±6.3     | <0.001        | <0.001        |
| nPNA (nPCR) (g/kg/day)        | <b>0.95±0.26</b>      | 0.93±0.26    | 0.92±0.24         | 1.01±0.26    | 1.02±0.28    | <0.001        | <0.001        |
| Serum albumin (g/dL)          | <b>3.66±0.48</b>      | 3.63±0.47    | 3.68±0.48         | 3.68±0.48    | 3.68±0.48    | <0.001        | <0.001        |
| Serum creatinine (mg/dL)      | <b>8.0±3.3</b>        | 6.8±2.7      | 9.3±3.6           | 8.0±3.2      | 8.2±3.4      | <0.001        | <0.001        |
| TIBC (mg/dL)                  | <b>208±47</b>         | 212±48       | 202±45            | 209±45       | 207±46       | <0.001        | <0.001        |

Supplementary Table S1; Streja et al, *AJKD*, "Role of Nutritional Status and Inflammation in Higher Survival of African American and Hispanic Hemodialysis Patients"

|                             |                 |          |          |          |          |        |        |
|-----------------------------|-----------------|----------|----------|----------|----------|--------|--------|
| Serum bicarbonate (mg/dL)   | <b>22.4±3.1</b> | 22.5±3.1 | 22.5±3.0 | 22.1±3.0 | 22.0±3.1 | <0.001 | 0.2    |
| Serum phosphorus (mg/dL)    | <b>5.6±1.5</b>  | 5.5±1.5  | 5.6±1.5  | 5.7±1.5  | 5.6±1.6  | <0.001 | 0.03   |
| Serum calcium (mg/dL)       | <b>9.2±0.7</b>  | 9.2±0.7  | 9.2±0.8  | 9.1±0.7  | 9.1±0.8  | <0.001 | <0.001 |
| Intact PTH (pg/mL)          | <b>344±362</b>  | 284±306  | 436±426  | 324±332  | 320±338  | <0.001 | <0.001 |
| Alkaline phosphatase (U/L)  | <b>120±92</b>   | 116±88   | 123±98   | 127±89   | 118±88   | <0.001 | 0.003  |
| Ferritin (ng/mL)            | <b>517±498</b>  | 479±459  | 558±536  | 493±467  | 580±546  | <0.001 | <0.001 |
| Hemoglobin (g/dL)           | <b>12.0±1.4</b> | 12.0±1.4 | 11.9±1.5 | 12.1±1.4 | 12.0±1.4 | <0.001 | <0.001 |
| WBC (x10 <sup>3</sup> /ul)  | <b>7.5±2.6</b>  | 7.9±2.8  | 7.0±2.4  | 7.6±2.3  | 7.6±2.6  | <0.001 | <0.001 |
| Lymphocyte (% of total WBC) | <b>20±8</b>     | 18±7     | 23±8     | 21±7     | 20±7     | <0.001 | <0.001 |

Characteristics for the base calendar quarter in 139,328 long-term hemodialysis patients. Values are in percentage or mean ± SD, as appropriate.
